# Supplementary material for: Diets high in corn oil or extra-virgin olive oil differentially modify the gene expression profile of the mammary gland and influence experimental breast cancer susceptibility
Source: PubMed Central journal article supplement (PMC4875377; doi:10.1007/s00394-015-0958-2), 2015-06-20
Supplement: 394_2015_958_MOESM4_ESM.pdf [file 394_2015_958_MOESM4_ESM.pdf]

**Article title:** Diets high in corn oil or extra virgin olive oil differentially modify the gene expression profile of the mammary gland and influence experimental breast cancer susceptibility

**Journal name:** European Journal of Nutrition

**Authors names:** Raquel Moral<sup>1</sup>, Raquel Escrich<sup>1</sup>, Montserrat Solanas<sup>1</sup>, Elena Vela<sup>1</sup>, M. Carme Ruíz de Villa<sup>2</sup>, Eduard Escrich<sup>1</sup>.

**Affiliations:** <sup>1</sup>Department of Cell Biology, Physiology and Immunology, Physiology Unit, Medicine School, Universitat Autònoma de Barcelona, 08193 Bellaterra, Barcelona, Spain; <sup>2</sup>Department of Statistics, Universitat de Barcelona, 08028 Barcelona, Spain.

**Corresponding author:** Dr. Eduard Escrich; Department of Cell Biology, Physiology and Immunology; Physiology Unit, Medicine School; Universitat Autònoma de Barcelona; 08193 Bellaterra (Barcelona), Spain. Phone: +34 93 581 14 23, Fax: +34 93 581 29 86. Eduard.Escrich@uab.es

#### **Electronic Supplementary Material 4:**

##### **Supplementary Table 4**

Enriched Gene Ontology (GO) categories in down- and up-modulated genes in mammary gland by effect of the experimental high fat diets.

Modulated genes were sub-classified in “common” (modulated in more than one group) or “specific” (found as modulated in one specific group)

Lists of “common” and “specific” genes found in high fat diet groups at 51 days of age were analyzed using Genecodis program by Babelomics platform setting GO annotations at level 3-6. Only statistically significant enriched categories are indicated.

## 51 days

### Common down-regulated genes (in HCO and HOO)

| <i>Gene Ontology category (levels 3-6)</i>     | <i>Items<sup>a</sup></i> | <i>S<sup>b</sup></i> | <i>TS<sup>c</sup></i> | <i>Hyp<sup>d</sup></i> | <i>Genes<sup>e</sup></i>                                                                                                             |
|------------------------------------------------|--------------------------|----------------------|-----------------------|------------------------|--------------------------------------------------------------------------------------------------------------------------------------|
| alcohol metabolic process                      | GO:0006066               | 18(61)               | 546(22938)            | 2, 32E-15              | Pdk1, Tkt, Taldo1, Pygl, Aldoa, G6pd, Bche, Sod1, Lss, Insig1, Dhcr7, Dgat2, Cyb5r3, Pdhb, Pc, Mdh1, Ldhb, Gpd1                      |
| lipid metabolic process                        | GO:0006629               | 19(61)               | 735(22938)            | 2, 72E-09              | Sod1, Lss, Lpin1, Insig1, Hsd17b12, Dhcr7, Dgat2, Cyb5r3, Akr1c14, Slc27a1, Scd, Pc, Gpd1, Gpam, Fabp4, Elovl6, Acsl1, Acaca, Adora1 |
| cellular lipid metabolic process               | GO:0044255               | 16(61)               | 622(22938)            | 4, 62E-07              | Sod1, Lss, Insig1, Hsd17b12, Dhcr7, Dgat2, Cyb5r3, Akr1c14, Slc27a1, Scd, Gpd1, Gpam, Fabp4, Elovl6, Acsl1, Acaca                    |
| cellular carbohydrate metabolic process        | GO:0044262               | 12(61)               | 341(22938)            | 8, 71E-06              | Acly, Tkt, Taldo1, Pygl, Aldoa, G6pd, Dgat2, Pdhb, Pc, Mdh1, Ldhb, Gpd1                                                              |
| oxidation reduction                            | GO:0055114               | 14(61)               | 564(22938)            | 1, 96E-05              | Sod3, Akr7a2, G6pd, Sod1, Hsd17b12, Dhcr7, Cyb5r3, Akr1c14, Scd, Pdhb, Me1, Mdh1, Ldhb, Gpd1                                         |
| organic acid metabolic process                 | GO:0006082               | 13(61)               | 567(22938)            | 2, 49E-05              | Slc27a1, Scd, Pdhb, Pc, Me1, Mdh1, Ldhb, Gpd1, Gpam, Fabp4, Elovl6, Acsl1, Acaca                                                     |
| lipid biosynthetic process                     | GO:0008610               | 11(61)               | 299(22938)            | 3, 60E-05              | Sod1, Lss, Hsd17b12, Dhcr7, Dgat2, Cyb5r3, Scd, Pc, Gpam, Elovl6, Acaca                                                              |
| cofactor metabolic process                     | GO:0051186               | 10(61)               | 230(22938)            | 4, 87E-05              | Tkt, Taldo1, Mgst1, G6pd, Sod1, Pdhb, Mdh1, Ldhb, Gpd1, Acaca                                                                        |
| carbohydrate metabolic process                 | GO:0005975               | 13(61)               | 674(22938)            | 1, 95E-04              | Pdk1, Acly, Tkt, Taldo1, Pygl, Aldoa, G6pd, Dgat2, Pdhb, Pc, Mdh1, Ldhb, Gpd1                                                        |
| carboxylic acid metabolic process              | GO:0019752               | 13(61)               | 566(22938)            | 2, 44E-04              | Slc27a1, Scd, Pdhb, Pc, Me1, Mdh1, Ldhb, Gpd1, Gpam, Fabp4, Elovl6, Acsl1, Acaca                                                     |
| generation of precursor metabolites and energy | GO:0006091               | 6(61)                | 335(22938)            | 2, 62E-04              | Pygl, Atp5o, Aldoa, Pdhb, Mdh1, Ldhb                                                                                                 |
| chemical homeostasis                           | GO:0048878               | 7(61)                | 483(22938)            | 2, 87E-04              | Pygl, Slc2a4, Sod1, Scd, Fabp4, Acaca, Adora1                                                                                        |
| hexose metabolic process                       | GO:0019318               | 10(61)               | 291(22938)            | 4, 72E-04              | Pdk1, Tkt, Taldo1, Aldoa, G6pd, Pdhb, Pc, Mdh1, Ldhb, Gpd1                                                                           |
| fat cell differentiation                       | GO:0045444               | 3(61)                | 60(22938)             | 5, 50E-04              | Slc2a4, Lpin1, Fabp4                                                                                                                 |
| regulation of multicellular organism growth    | GO:0040014               | 3(61)                | 61(22938)             | 5, 77E-04              | G6pd, Sod1, Gpam                                                                                                                     |
| mitochondrial transport                        | GO:0006839               | 3(61)                | 63(22938)             | 6, 34E-04              | Slc25a10, Slc25a1, Atp5o                                                                                                             |
| response to hormone stimulus                   | GO:0009725               | 6(61)                | 399(22938)            | 6, 61E-04              | Aldoa, Bche, Lpin1, Insig1, Me1, Fabp4                                                                                               |
| regulation of blood vessel size                | GO:0050880               | 3(61)                | 77(22938)             | 1, 14E-03              | G6pd, Sod1, Adora1                                                                                                                   |
| response to organic cyclic substance           | GO:0014070               | 4(61)                | 178(22938)            | 1, 30E-03              | Aldoa, G6pd, Acsl1, Acaca                                                                                                            |

|                                                      |            |        |            |           |                                                                         |
|------------------------------------------------------|------------|--------|------------|-----------|-------------------------------------------------------------------------|
| homeostatic process                                  | GO:0042592 | 8(61)  | 840(22938) | 1, 65E-03 | Pygl, Slc2a4, G6pd, Sod1, Scd, Fabp4, Acaca, Adora1                     |
| regulation of lipid metabolic process                | GO:0019216 | 3(61)  | 88(22938)  | 1, 67E-03 | Sod1, Dhcr7, Adora1                                                     |
| peptide metabolic process                            | GO:0006518 | 3(61)  | 88(22938)  | 1, 67E-03 | Mgst1, G6pd, Sod1                                                       |
| regulation of blood pressure                         | GO:0008217 | 3(61)  | 95(22938)  | 2, 08E-03 | G6pd, Sod1, Adora1                                                      |
| sulfur metabolic process                             | GO:0006790 | 3(61)  | 98(22938)  | 2, 27E-03 | Mgst1, G6pd, Sod1                                                       |
| response to nutrient levels                          | GO:0031667 | 4(61)  | 227(22938) | 3, 14E-03 | G6pd, Bche, Sod1, Acsl1                                                 |
| response to steroid hormone stimulus                 | GO:0048545 | 4(61)  | 236(22938) | 3, 60E-03 | Aldoa, Bche, Insig1, Fabp4                                              |
| response to extracellular stimulus                   | GO:0009991 | 4(61)  | 245(22938) | 4, 12E-03 | G6pd, Bche, Sod1, Acsl1                                                 |
| regulation of growth                                 | GO:0040008 | 4(61)  | 250(22938) | 4, 42E-03 | Tkt, G6pd, Sod1, Gpam                                                   |
| cellular macromolecule catabolic process             | GO:0044265 | 11(61) | 485(22938) | 5, 44E-03 | Ubc, Tkt, Taldo1, Pygl, Aldoa, G6pd, Sod1, Pdhb, Mdh1, Ldhb, Gpd1       |
| glycerolipid metabolic process                       | GO:0046486 | 3(61)  | 136(22938) | 5, 71E-03 | Dgat2, Gpd1, Gpam                                                       |
| response to oxidative stress                         | GO:0006979 | 3(61)  | 165(22938) | 9, 70E-03 | Sod3, G6pd, Sod1                                                        |
| cytokine production                                  | GO:0001816 | 3(61)  | 166(22938) | 9, 86E-03 | G6pd, Sod1, Fabp4                                                       |
| blood circulation                                    | GO:0008015 | 3(61)  | 184(22938) | 1, 30E-02 | G6pd, Sod1, Adora1                                                      |
| transmission of nerve impulse                        | GO:0019226 | 4(61)  | 355(22938) | 1, 47E-02 | Bche, Sod1, Scd, Adora1                                                 |
| cellular amino acid and derivative metabolic process | GO:0006519 | 4(61)  | 357(22938) | 1, 50E-02 | Mgst1, G6pd, Bche, Sod1                                                 |
| vitamin metabolic process                            | GO:0006766 | 6(61)  | 99(22938)  | 2, 54E-02 | Tkt, Taldo1, G6pd, Mdh1, Ldhb, Gpd1                                     |
| heterocycle metabolic process                        | GO:0046483 | 4(61)  | 424(22938) | 2, 63E-02 | Tkt, Pygl, Atp5o, Adora1                                                |
| response to external stimulus                        | GO:0009605 | 6(61)  | 913(22938) | 3, 40E-02 | G6pd, Bche, Sod1, Fabp4, Acsl1, Adora1                                  |
| response to organic substance                        | GO:0010033 | 11(61) | 746(22938) | 3, 80E-02 | Mgst1, Aldoa, G6pd, Bche, Sod1, Lpin1, Insig1, Me1, Fabp4, Acsl1, Acaca |
| response to biotic stimulus                          | GO:0009607 | 3(61)  | 289(22938) | 4, 17E-02 | Ifitm2, Mgst1, Aldoa                                                    |
| steroid metabolic process                            | GO:0008202 | 7(61)  | 177(22938) | 4, 44E-02 | Sod1, Lss, Insig1, Hsd17b12, Dhcr7, Cyb5r3, Akr1c14                     |

### Specific down-regulated genes (only in HCO)

| <i>Gene Ontology category (levels 3-6)</i> | <i>Items</i> | <i>S</i> | <i>TS</i>  | <i>Hyp</i> | <i>Genes</i>                 |
|--------------------------------------------|--------------|----------|------------|------------|------------------------------|
| lipid catabolic process                    | GO:0016042   | 4(38)    | 152(22938) | 1, 15E-04  | Smpdl3a, Prdx6, Echs1, Cebpa |
| transmembrane transport                    | GO:0055085   | 4(38)    | 165(22938) | 1, 57E-04  | Atp5i, Atp5e, Atp5g3, Atp5g2 |

|                                                |            |       |            |           |                                                                |
|------------------------------------------------|------------|-------|------------|-----------|----------------------------------------------------------------|
| response to organic substance                  | GO:0010033 | 7(38) | 746(22938) | 1, 96E-04 | Hsp90ab1, Atp5g3, Atp5g2, Uqcrrs1, Aldh2, Mif, Cebpa           |
| generation of precursor metabolites and energy | GO:0006091 | 9(38) | 334(22938) | 2, 97E-04 | Atp5i, Atp5e, Atp5g3, Atp5g2, Uqcrrs1, Cat, Pfkfb3, Mif, Cebpa |
| ion transport                                  | GO:0006811 | 7(38) | 873(22938) | 5, 08E-04 | Slc36a2, Atp5i, Atp5e, Atp5g3, Atp5g2, Vdac1, Mif              |
| response to biotic stimulus                    | GO:0009607 | 4(38) | 289(22938) | 1, 30E-03 | Mx1, Hsp90ab1, Mif, Cebpa                                      |
| response to nutrient                           | GO:0007584 | 3(38) | 158(22938) | 2, 27E-03 | Cox4i1, Mif, Cebpa                                             |
| cellular response to stimulus                  | GO:0051716 | 5(38) | 616(22938) | 3, 31E-03 | Aldh2, Prdx6, Cat, Mif, Cebpa                                  |
| response to hormone stimulus                   | GO:0009725 | 4(38) | 398(22938) | 4, 14E-03 | Uqcrrs1, Aldh2, Mif, Cebpa                                     |
| heterocycle metabolic process                  | GO:0046483 | 4(38) | 424(22938) | 5, 17E-03 | Atp5i, Atp5e, Atp5g3, Atp5g2                                   |
| response to other organism                     | GO:0051707 | 3(38) | 225(22938) | 6, 10E-03 | Mx1, Mif, Cebpa                                                |
| response to nutrient levels                    | GO:0031667 | 3(38) | 227(22938) | 6, 25E-03 | Cox4i1, Mif, Cebpa                                             |
| response to steroid hormone stimulus           | GO:0048545 | 3(38) | 235(22938) | 6, 88E-03 | Aldh2, Mif, Cebpa                                              |
| response to extracellular stimulus             | GO:0009991 | 3(38) | 245(22938) | 7, 71E-03 | Cox4i1, Mif, Cebpa                                             |
| cellular macromolecule catabolic process       | GO:0044265 | 4(38) | 485(22938) | 8, 25E-03 | Pfkfb3, Mif, Dnase2a, Cebpa                                    |
| apoptosis                                      | GO:0006915 | 5(38) | 790(22938) | 9, 37E-03 | Vdac1, Cstb, Cat, Dnase2a, Cebpa                               |
| programmed cell death                          | GO:0012501 | 5(38) | 798(22938) | 9, 76E-03 | Vdac1, Cstb, Cat, Dnase2a, Cebpa                               |
| cell death                                     | GO:0008219 | 5(38) | 826(22938) | 1, 12E-02 | Vdac1, Cstb, Cat, Dnase2a, Cebpa                               |
| inflammatory response                          | GO:0006954 | 3(38) | 294(22938) | 1, 26E-02 | Ddt, Mif, Cebpa                                                |
| immune system development                      | GO:0002520 | 3(38) | 304(22938) | 1, 38E-02 | LOC364236, Dnase2a, Cebpa                                      |
| cellular carbohydrate metabolic process        | GO:0044262 | 3(38) | 338(22938) | 1, 83E-02 | Pfkfb3, Mif, Cebpa                                             |
| central nervous system development             | GO:0007417 | 3(38) | 374(22938) | 2, 38E-02 | Pfkfb3, Mif, Cebpa                                             |
| cellular response to stress                    | GO:0033554 | 3(38) | 430(22938) | 3, 40E-02 | Prdx6, Cat, Mif                                                |
| behavior                                       | GO:0007610 | 3(38) | 443(22938) | 3, 67E-02 | Cstb, Mif, Cebpa                                               |
| homeostatic process                            | GO:0042592 | 4(38) | 839(22938) | 4, 91E-02 | Prdx6, LOC364236, Dnase2a, Cebpa                               |

### Specific down-regulated genes (only in HOO)

| <i>Gene Ontology category (levels 3-6)</i> | <i>Items</i> | <i>S</i> | <i>TS</i>  | <i>Hyp</i> | <i>Genes</i>                          |
|--------------------------------------------|--------------|----------|------------|------------|---------------------------------------|
| response to external stimulus              | GO:0009605   | 6(23)    | 915(22938) | 2, 23E-04  | Scnn1b, Gas6, Tgfb3, C6, Timp3, Pparg |

|                                                  |            |       |            |           |                                    |
|--------------------------------------------------|------------|-------|------------|-----------|------------------------------------|
| tissue development                               | GO:0009888 | 5(23) | 607(22938) | 2, 89E-04 | Gas6, Tgfb3, Timp3, Nsdhl, Pparg   |
| cellular carbohydrate metabolic process          | GO:0044262 | 4(23) | 340(22938) | 3, 36E-04 | Lalba, Hk2, Nsdhl, Hsd11b1         |
| GO:0016052                                       | GO:0016052 | 3(23) | 143(22938) | 3, 83E-04 | Chi3l1, Hk2, Hsd11b1               |
| carbohydrate metabolic process                   | GO:0005975 | 5(23) | 673(22938) | 4, 65E-04 | Lalba, Chi3l1, Hk2, Nsdhl, Hsd11b1 |
| reproductive process in a multicellular organism | GO:0048609 | 4(23) | 405(22938) | 6, 50E-04 | Rgs2, Tgfb3, Hk2, Kit              |
| response to steroid hormone stimulus             | GO:0048545 | 3(23) | 237(22938) | 1, 66E-03 | Tgfb3, Timp3, Pparg                |
| nuclear transport                                | GO:0051169 | 3(23) | 242(22938) | 1, 76E-03 | Rnd3, Rab34, Tgfb3                 |
| regulation of catalytic activity                 | GO:0050790 | 4(23) | 567(22938) | 2, 25E-03 | Tgfb3, C6, Kit, Pparg              |
| positive regulation of cell death                | GO:0010942 | 3(23) | 294(22938) | 3, 05E-03 | Tgfb3, C6, Timp3                   |
| cellular lipid metabolic process                 | GO:0044255 | 4(23) | 622(22938) | 3, 15E-03 | Nsdhl, Kit, Hsd11b1, Pparg         |
| regulation of programmed cell death              | GO:0043067 | 4(23) | 642(22938) | 3, 52E-03 | Tgfb3, C6, Timp3, Kit              |
| positive regulation of catalytic activity        | GO:0043085 | 3(23) | 343(22938) | 4, 70E-03 | Tgfb3, C6, Kit                     |
| lipid metabolic process                          | GO:0006629 | 4(23) | 736(22938) | 5, 72E-03 | Nsdhl, Kit, Hsd11b1, Pparg         |
| protein transport                                | GO:0015031 | 4(23) | 752(22938) | 6, 17E-03 | Rnd3, Rab34, Tgfb3, Pparg          |
| establishment of protein localization            | GO:0045184 | 4(23) | 762(22938) | 6, 47E-03 | Rnd3, Rab34, Tgfb3, Pparg          |
| response to hormone stimulus                     | GO:0009725 | 3(23) | 400(22938) | 7, 19E-03 | Tgfb3, Timp3, Pparg                |
| programmed cell death                            | GO:0012501 | 4(23) | 799(22938) | 7, 63E-03 | Tgfb3, C6, Timp3, Kit              |
| cell death                                       | GO:0008219 | 4(23) | 827(22938) | 8, 60E-03 | Tgfb3, C6, Timp3, Kit              |
| regulation of cell differentiation               | GO:0045595 | 3(23) | 433(22938) | 8, 94E-03 | Tgfb3, Kit, Pparg                  |
| protein localization                             | GO:0008104 | 4(23) | 869(22938) | 1, 02E-02 | Rnd3, Rab34, Tgfb3, Pparg          |
| cellular macromolecule catabolic process         | GO:0044265 | 3(23) | 484(22938) | 1, 21E-02 | Timp3, Hk2, Hsd11b1                |
| response to abiotic stimulus                     | GO:0009628 | 3(23) | 491(22938) | 1, 26E-02 | Timp3, Kit, Pparg                  |
| cellular protein localization                    | GO:0034613 | 3(23) | 509(22938) | 1, 38E-02 | Rnd3, Rab34, Tgfb3                 |
| alcohol metabolic process                        | GO:0006066 | 3(23) | 545(22938) | 1, 66E-02 | Hk2, Nsdhl, Hsd11b1                |
| negative regulation of metabolic process         | GO:0009892 | 3(23) | 547(22938) | 1, 68E-02 | Tgfb3, Timp3, Pparg                |
| oxidation reduction                              | GO:0055114 | 3(23) | 562(22938) | 1, 80E-02 | Aox3, Nsdhl, Hsd11b1               |

|                                          |            |       |            |           |                     |
|------------------------------------------|------------|-------|------------|-----------|---------------------|
| regulation of cell proliferation         | GO:0042127 | 3(23) | 584(22938) | 1, 99E-02 | Tgfb3, Kit, Pparg   |
| intracellular transport                  | GO:0046907 | 3(23) | 657(22938) | 2, 71E-02 | Rnd3, Rab34, Tgfb3  |
| organ morphogenesis                      | GO:0009887 | 3(23) | 675(22938) | 2, 90E-02 | Gas6, Tgfb3, Pparg  |
| regulation of signal transduction        | GO:0009966 | 3(23) | 734(22938) | 3, 59E-02 | Rgs2, Tgfb3, Kit    |
| cell proliferation                       | GO:0008283 | 3(23) | 747(22938) | 3, 75E-02 | Tgfb3, Kit, Pparg   |
| response to organic substance            | GO:0010033 | 3(23) | 748(22938) | 3, 77E-02 | Tgfb3, Timp3, Pparg |
| positive regulation of metabolic process | GO:0009893 | 3(23) | 749(22938) | 3, 78E-02 | Tgfb3, Kit, Pparg   |
| apoptosis                                | GO:0006915 | 3(23) | 791(22938) | 4, 33E-02 | Tgfb3, C6, Timp3    |
| regulation of developmental process      | GO:0050793 | 3(23) | 819(22938) | 4, 72E-02 | Tgfb3, Kit, Pparg   |

<sup>a</sup>: enriched Gene Ontology categories

<sup>b</sup>: number of genes in the input list that have been matched in the enriched set and the total number of genes in the list

<sup>c</sup>: number of genes in the reference list that match with the enriched set and total number of genes in the reference list

<sup>d</sup>: pvalue calculated by the hypergeometric function

<sup>e</sup>: the genes of the input list that match with the enriched items
