# Supplementary material for: Diets high in corn oil or extra-virgin olive oil differentially modify the gene expression profile of the mammary gland and influence experimental breast cancer susceptibility
Source: PubMed Central journal article supplement (PMC4875377; doi:10.1007/s00394-015-0958-2), 2015-06-20
Supplement: 394_2015_958_MOESM5_ESM.pdf [file 394_2015_958_MOESM5_ESM.pdf]

**Article title:** Diets high in corn oil or extra virgin olive oil differentially modify the gene expression profile of the mammary gland and influence experimental breast cancer susceptibility

**Journal name:** European Journal of Nutrition

**Authors names:** Raquel Moral<sup>1</sup>, Raquel Escrich<sup>1</sup>, Montserrat Solanas<sup>1</sup>, Elena Vela<sup>1</sup>, M. Carme Ruíz de Villa<sup>2</sup>, Eduard Escrich<sup>1</sup>.

**Affiliations:** <sup>1</sup>Department of Cell Biology, Physiology and Immunology, Physiology Unit, Medicine School, Universitat Autònoma de Barcelona, 08193 Bellaterra, Barcelona, Spain; <sup>2</sup>Department of Statistics, Universitat de Barcelona, 08028 Barcelona, Spain.

**Corresponding author:** Dr. Eduard Escrich; Department of Cell Biology, Physiology and Immunology; Physiology Unit, Medicine School; Universitat Autònoma de Barcelona; 08193 Bellaterra (Barcelona), Spain. Phone: +34 93 581 14 23, Fax: +34 93 581 29 86. Eduard.Escrich@uab.es

## **Electronic Supplementary Material 5:**

### **Supplementary Table 5**

Enriched Gene Ontology (GO) categories in down- and up-modulated genes in mammary gland by effect of the experimental high fat diets.

Modulated genes were sub-classified in "common" (modulated in more than one group) or "specific" (found as modulated in one specific group)

Lists of “specific” and “common” genes found in high fat diet groups at 246 days of age were analyzed using Genecodis program by Babelomics platform setting GO annotations at level 3-6. Only statistically significant enriched categories are indicated.

## 246 days

### Common down-regulated genes (in HCO, LF-HCO, HOO and LF-HOO)

| <i>Gene Ontology category (levels 3-6)</i>     | <i>Items<sup>a</sup></i> | <i>S<sup>b</sup></i> | <i>TS<sup>c</sup></i> | <i>Hyp<sup>d</sup></i> | <i>Genes<sup>e</sup></i>                         |
|------------------------------------------------|--------------------------|----------------------|-----------------------|------------------------|--------------------------------------------------|
| hexose metabolic process                       | GO:0019318               | 4(21)                | 291(22938)            | 1,28E-04               | Pdk1, Aldoa, Pdhb, Pc                            |
| carboxylic acid metabolic process              | GO:0019752               | 5(21)                | 566(22938)            | 1,32E-04               | Pdhb, Pc, Me1, Gpam, Elovl6                      |
| organic acid metabolic process                 | GO:0006082               | 5(21)                | 567(22938)            | 1,33E-04               | Pdhb, Pc, Me1, Gpam, Elovl6                      |
| cellular lipid metabolic process               | GO:0044255               | 5(21)                | 622(22938)            | 2,05E-04               | Nsdhl, Dhcr7, Chpt1, Gpam, Elovl6                |
| carbohydrate biosynthetic process              | GO:0016051               | 3(21)                | 141(22938)            | 2,79E-04               | Pygl, Nsdhl, Pc                                  |
| alcohol metabolic process                      | GO:0006066               | 8(21)                | 546(22938)            | 1,52E-03               | Pdk1, Pygl, Aldoa, Nsdhl, Dhcr7, Chpt1, Pdhb, Pc |
| oxidation reduction                            | GO:0055114               | 4(21)                | 564(22938)            | 1,55E-03               | Nsdhl, Dhcr7, Pdhb, Me1                          |
| generation of precursor metabolites and energy | GO:0006091               | 3(21)                | 335(22938)            | 3,38E-03               | Pygl, Aldoa, Pdhb                                |
| cellular macromolecule catabolic process       | GO:0044265               | 3(21)                | 485(22938)            | 9,41E-03               | Pygl, Aldoa, Pdhb                                |
| lipid biosynthetic process                     | GO:0008610               | 6(21)                | 298(22938)            | 2,11E-02               | Nsdhl, Dhcr7, Chpt1, Pc, Gpam, Elovl6            |
| cellular carbohydrate metabolic process        | GO:0044262               | 6(21)                | 341(22938)            | 4,64E-02               | Acly, Pygl, Aldoa, Nsdhl, Pdhb, Pc               |
| response to external stimulus                  | GO:0009605               | 3(21)                | 915(22938)            | 4,93E-02               | Cox4i1, C6, Scnn1b                               |

### Common down-regulated genes (in HCO, LF-HCO and LF-HOO)

| <i>Gene Ontology category (levels 3-6)</i> | <i>Items</i> | <i>S</i> | <i>TS</i>  | <i>Hyp</i> | <i>Genes</i>                      |
|--------------------------------------------|--------------|----------|------------|------------|-----------------------------------|
| oxidation reduction                        | GO:0055114   | 5(21)    | 562(22938) | 1,27E-04   | Prdx6, Mdh1, Ldhd, Hsd17b12, Aox3 |
| alcohol metabolic process                  | GO:0006066   | 4(21)    | 546(22938) | 1,38E-03   | Dgat2, Bche, Mdh1, Ldhd           |
| cellular lipid metabolic process           | GO:0044255   | 4(21)    | 623(22938) | 2,23E-03   | Dgat2, Echs1, Prdx6, Hsd17b12     |
| cellular carbohydrate metabolic process    | GO:0044262   | 3(21)    | 341(22938) | 3,55E-03   | Dgat2, Mdh1, Ldhd                 |
| lipid metabolic process                    | GO:0006629   | 4(21)    | 737(22938) | 4,09E-03   | Dgat2, Echs1, Prdx6, Hsd17b12     |
| carboxylic acid metabolic process          | GO:0019752   | 3(21)    | 566(22938) | 1,43E-02   | Echs1, Mdh1, Ldhd                 |
| organic acid metabolic process             | GO:0006082   | 3(21)    | 567(22938) | 1,43E-02   | Echs1, Mdh1, Ldhd                 |
| intracellular transport                    | GO:0046907   | 3(21)    | 657(22938) | 2,12E-02   | Slc25a10, Vdac1, Tgfb3            |
| carbohydrate metabolic process             | GO:0005975   | 3(21)    | 674(22938) | 2,27E-02   | Dgat2, Mdh1, Ldhd                 |
| apoptosis                                  | GO:0006915   | 3(21)    | 791(22938) | 3,42E-02   | Vdac1, Cdkn2c, Tgfb3              |

|                       |            |       |            |          |                        |
|-----------------------|------------|-------|------------|----------|------------------------|
| programmed cell death | GO:0012501 | 3(21) | 799(22938) | 3,51E-02 | Vdac1,Cdkn2c,Tgfb3     |
| cell death            | GO:0008219 | 3(21) | 827(22938) | 3,83E-02 | Vdac1,Cdkn2c,Tgfb3     |
| ion transport         | GO:0006811 | 3(21) | 873(22938) | 4,39E-02 | Slc36a2,Slc25a10,Vdac1 |

### Common down-regulated genes (in HCO and LF-HCO)

| <i>Gene Ontology category (levels 3-6)</i>     | <i>Items</i> | <i>S</i> | <i>TS</i>  | <i>Hyp</i> | <i>Genes</i>                          |
|------------------------------------------------|--------------|----------|------------|------------|---------------------------------------|
| response to steroid hormone stimulus           | GO:0048545   | 4(25)    | 237(22938) | 1,19E-04   | Insig1,Cdo1,Pparg,Ldha                |
| response to organic substance                  | GO:0010033   | 6(25)    | 748(22938) | 1,23E-04   | Insig1,Cdo1,Atp5g3,Uqcrfs1,Pparg,Ldha |
| generation of precursor metabolites and energy | GO:0006091   | 4(25)    | 335(22938) | 4,44E-04   | Atp5o,Atp5g3,Uqcrfs1,Ldha             |
| response to peptide hormone stimulus           | GO:0043434   | 3(25)    | 188(22938) | 1,09E-03   | Insig1,Cdo1,Pparg                     |
| response to wounding                           | GO:0009611   | 4(25)    | 545(22938) | 2,68E-03   | Pparg,Gas6,Ddt,Cfb                    |
| response to external stimulus                  | GO:0009605   | 5(25)    | 913(22938) | 2,70E-03   | Pparg,Ldha,Gas6,Ddt,Cfb               |
| oxidation reduction                            | GO:0055114   | 4(25)    | 564(22938) | 3,03E-03   | Cyb5r3,Cdo1,Uqcrfs1,Ldha              |
| inflammatory response                          | GO:0006954   | 3(25)    | 295(22938) | 3,93E-03   | Pparg,Ddt,Cfb                         |
| cellular lipid metabolic process               | GO:0044255   | 4(25)    | 623(22938) | 4,33E-03   | Dgat1,Cyb5r3,Insig1,Pparg             |
| response to drug                               | GO:0042493   | 3(25)    | 306(22938) | 4,35E-03   | Uqcrfs1,Pparg,Ldha                    |
| lipid metabolic process                        | GO:0006629   | 4(25)    | 737(22938) | 7,81E-03   | Dgat1,Cyb5r3,Insig1,Pparg             |
| heterocycle metabolic process                  | GO:0046483   | 3(25)    | 424(22938) | 1,07E-02   | Atp1a4,Atp5o,Atp5g3                   |
| defense response                               | GO:0006952   | 3(25)    | 546(22938) | 2,09E-02   | Pparg,Ddt,Cfb                         |
| alcohol metabolic process                      | GO:0006066   | 3(25)    | 546(22938) | 2,09E-02   | Cyb5r3,Insig1,Ldha                    |
| carboxylic acid metabolic process              | GO:0019752   | 3(25)    | 567(22938) | 2,31E-02   | Cdo1,Pparg,Ldha                       |
| organic acid metabolic process                 | GO:0006082   | 3(25)    | 568(22938) | 2,32E-02   | Cdo1,Pparg,Ldha                       |
| regulation of programmed cell death            | GO:0043067   | 3(25)    | 642(22938) | 3,18E-02   | Serpib9,Hspb1,Ldha                    |
| cation transport                               | GO:0006812   | 3(25)    | 668(22938) | 3,51E-02   | Atp1a4,Atp5o,Atp5g3                   |

### Specific down-regulated genes (only in HCO)

| <i>Gene Ontology category (levels 3-6)</i>           | <i>Items</i> | <i>S</i> | <i>TS</i>  | <i>Hyp</i> | <i>Genes</i>          |
|------------------------------------------------------|--------------|----------|------------|------------|-----------------------|
| cellular amino acid and derivative metabolic process | GO:0006519   | 3(30)    | 356(22938) | 1,10E-02   | Gstk1,lvd,Fah         |
| ion transport                                        | GO:0006811   | 4(30)    | 873(22938) | 2,60E-02   | Kcnn3,Kcnh1,Atp5i,Tst |

### Specific down-regulated genes (only in LF-HCO)

| Gene Ontology category (levels 3-6)                  | Items      | S     | TS         | Hyp      | Genes                       |
|------------------------------------------------------|------------|-------|------------|----------|-----------------------------|
| carboxylic acid metabolic process                    | GO:0019752 | 5(20) | 566(22938) | 1,02E-04 | Psat1,Asrgl1,Ptges,Gpd1,Ghr |
| organic acid metabolic process                       | GO:0006082 | 5(20) | 567(22938) | 1,03E-04 | Psat1,Asrgl1,Ptges,Gpd1,Ghr |
| amine metabolic process                              | GO:0009308 | 4(20) | 395(22938) | 3,37E-04 | Psat1,Asrgl1,Aoc3,Ghr       |
| lipid metabolic process                              | GO:0006629 | 5(20) | 735(22938) | 3,46E-04 | Ptges,Plin,Lpin1,Gpd1,Ghr   |
| cellular amino acid and derivative metabolic process | GO:0006519 | 3(20) | 357(22938) | 3,50E-03 | Psat1,Asrgl1,Ghr            |
| oxidation reduction                                  | GO:0055114 | 3(20) | 564(22938) | 1,23E-02 | Etfb,Aoc3,Gpd1              |
| cellular lipid metabolic process                     | GO:0044255 | 3(20) | 622(22938) | 1,60E-02 | Ptges,Gpd1,Ghr              |
| response to organic substance                        | GO:0010033 | 3(20) | 748(22938) | 2,60E-02 | Ptges,Lpin1,Ghr             |
| response to external stimulus                        | GO:0009605 | 3(20) | 912(22938) | 4,31E-02 | Fgg,Ptges,Ghr               |

### Specific down-regulated genes (only in LF-HOO)

| Gene Ontology category (levels 3-6) | Items      | S    | TS         | Hyp     | Genes                  |
|-------------------------------------|------------|------|------------|---------|------------------------|
| ion transport                       | GO:0006811 | 3(9) | 873(22938) | 0,00388 | Slc34a2,Slc25a1,Scnn1g |

### Specific up-regulated genes (only in LF-HOO)

| Gene Ontology category (levels 3-6)      | Items      | S     | TS         | Hyp      | Genes             |
|------------------------------------------|------------|-------|------------|----------|-------------------|
| regulation of signal transduction        | GO:0009966 | 3(19) | 734(22938) | 2,16E-02 | Sipa1,Lef1,Il6ra  |
| positive regulation of metabolic process | GO:0009893 | 3(19) | 748(22938) | 2,27E-02 | Lef1,Klf2,Il6ra   |
| response to organic substance            | GO:0010033 | 3(19) | 748(22938) | 2,27E-02 | Hmgcs2,Lef1,Il6ra |
| regulation of cell communication         | GO:0010646 | 3(19) | 906(22938) | 3,71E-02 | Sipa1,Lef1,Il6ra  |

<sup>a</sup>: enriched Gene Ontology categories

<sup>b</sup>: number of genes in the input list that have been matched in the enriched set and the total number of genes in the list

<sup>c</sup>: number of genes in the reference list that match with the enriched set and total number of genes in the reference list

<sup>d</sup>: pvalue calculated by the hypergeometric function

<sup>e</sup>: the genes of the input list that match with the enriched items
