# Supplementary material for: Diets high in corn oil or extra-virgin olive oil differentially modify the gene expression profile of the mammary gland and influence experimental breast cancer susceptibility
Source: Springer Nature journal article supplement (doi:10.1007/s00394-015-0958-2), 2015-06-19
Supplement: MOESM1 [file 8392274]

**Article title:** Diets high in corn oil or extra virgin olive oil differentially modify the gene expression profile of the mammary gland and influence experimental breast cancer susceptibility

**Journal name:** European Journal of Nutrition

**Authors names:** Raquel Moral<sup>1</sup>, Raquel Escrich<sup>1</sup>, Montserrat Solanas<sup>1</sup>, Elena Vela<sup>1</sup>, M. Carme Ruíz de Villa<sup>2</sup>, Eduard Escrich<sup>1</sup>.

**Affiliations:** <sup>1</sup>Department of Cell Biology, Physiology and Immunology, Physiology Unit, Medicine School, Universitat Autònoma de Barcelona, 08193 Bellaterra, Barcelona, Spain; <sup>2</sup>Department of Statistics, Universitat de Barcelona, 08028 Barcelona, Spain.

**Corresponding author:** Dr. Eduard Escrich; Department of Cell Biology, Physiology and Immunology; Physiology Unit, Medicine School; Universitat Autònoma de Barcelona; 08193 Bellaterra (Barcelona), Spain. Phone: +34 93 581 14 23, Fax: +34 93 581 29 86. Eduard.Escrich@uab.es

## **Electronic Supplementary Material 1:**

### **Supplementary Table 1**

Composition of the experimental diets

| Diet composition (g/kg)  | Low fat | High corn oil | High olive oil |
|--------------------------|---------|---------------|----------------|
| Proteins (casein)        | 180     | 230           | 230            |
| Carbohydrates (dextrose) | 679     | 459           | 459            |
| Lipids:                  |         |               |                |
| Corn oil                 | 30      | 200           | 30             |
| Extra virgin olive oil   | 0       | 0             | 170            |
| Fibre (cellulose)        | 50      | 50            | 50             |
| Mineral mix <sup>a</sup> | 59      | 59            | 59             |
| Vitamin mix <sup>a</sup> | 2.4     | 2.4           | 2.4            |

| Fatty acids in the oils (%)                | Corn oil | Extra-virgin olive oil |
|--------------------------------------------|----------|------------------------|
| C16:0 (palmitic)                           | 11.1     | 13.2                   |
| C16:1 (palmitoleic)                        | 0.2      | 1.3                    |
| C17:0 (margaric)                           | 0.1      | 0.1                    |
| C17:1 (margaroleic)                        | 0.0      | 0.2                    |
| C18:0 (stearic)                            | 2.3      | 2.5                    |
| C18:1 (oleic)                              | 31.7     | 73.7                   |
| C18:1 <i>trans-double bound</i> (elaidic)  | 0.1      | 0.0                    |
| C18:2 (linoleic)                           | 51.3     | 7.3                    |
| C18:2 <i>trans-double bound</i> linoleics  | 1.3      | 0.0                    |
| C18:3 (linolenic)                          | 0.5      | 0.8                    |
| C18:3 <i>trans-double bound</i> linolenics | 0.3      | 0.0                    |
| C20:0 (arachidic)                          | 0.5      | 0.4                    |
| C20:1 (eicosenoic)                         | 0.2      | 0.3                    |
| C22:0 (docosanoic)                         | 0.2      | 0.1                    |
| C24:0 (lignoceric)                         | 0.2      | 0.1                    |
| Total saturated                            | 14.4     | 16.4                   |
| Total monounsaturated                      | 32.1     | 75.5                   |
| Total n-6 polyunsaturated                  | 51.3     | 7.3                    |
| Total n-3 polyunsaturated                  | 0.5      | 0.8                    |
| Total <i>trans-double bound</i> isomers    | 1.7      | 0.0                    |

<sup>a</sup>: The composition of mineral and vitamin mixes is given in [1]

---

[1] Escrich E, Solanas M, Segura R (1994) Experimental diets for the study of lipid influence on induced mammary carcinoma in rats: I – Diet definition. *In Vivo* 8: 1099-1106
