# Supplementary material for: Diets high in corn oil or extra-virgin olive oil differentially modify the gene expression profile of the mammary gland and influence experimental breast cancer susceptibility
Source: Springer Nature journal article supplement (doi:10.1007/s00394-015-0958-2), 2015-06-19
Supplement: MOESM2 [file 8392274]

**Article title:** Diets high in corn oil or extra virgin olive oil differentially modify the gene expression profile of the mammary gland and influence experimental breast cancer susceptibility

**Journal name:** European Journal of Nutrition

**Authors names:** Raquel Moral<sup>1</sup>, Raquel Escrich<sup>1</sup>, Montserrat Solanas<sup>1</sup>, Elena Vela<sup>1</sup>, M. Carme Ruíz de Villa<sup>2</sup>, Eduard Escrich<sup>1</sup>.

**Affiliations:** <sup>1</sup>Department of Cell Biology, Physiology and Immunology, Physiology Unit, Medicine School, Universitat Autònoma de Barcelona, 08193 Bellaterra, Barcelona, Spain; <sup>2</sup>Department of Statistics, Universitat de Barcelona, 08028 Barcelona, Spain.

**Corresponding author:** Dr. Eduard Escrich; Department of Cell Biology, Physiology and Immunology; Physiology Unit, Medicine School; Universitat Autònoma de Barcelona; 08193 Bellaterra (Barcelona), Spain. Phone: +34 93 581 14 23, Fax: +34 93 581 29 86. Eduard.Escrich@uab.es

## **Electronic Supplementary Material 2:**

### **Supplementary Table 2**

Enriched Gene Ontology (GO) categories in down- and up-modulated genes in mammary gland by effect of the experimental high fat diets.

Lists of all genes found modulated in each group were analyzed using Genecodis program by Babelomics platform setting GO annotations at level 3. Only statistically significant enriched categories are indicated.

## 36 days

### HCO down-regulated

| <i>Gene Ontology category (level 3)</i> | <i>Items<sup>a</sup></i> | <i>S<sup>b</sup></i> | <i>TS<sup>c</sup></i> | <i>Hyp<sup>d</sup></i> | <i>Genes<sup>e</sup></i>                                                                                                                                          |
|-----------------------------------------|--------------------------|----------------------|-----------------------|------------------------|-------------------------------------------------------------------------------------------------------------------------------------------------------------------|
| immune response                         | GO:0006955               | 21(154)              | 305(22938)            | 1, 65E-10              | LOC688090, RT1-Bb, Cd79b, Cd37, Cd74, Hla-dmb, Cd19, ccl21b, hla-dma, Il2rg, Irf8, Ets1, Rab27a, Arbp, Cd28, Lyn, Tgfb1, RT1-Ba, cd8a, Rbm4, Rbm4b                |
| cell activation                         | GO:0001775               | 14(154)              | 119(22938)            | 6, 69E-09              | cd5, hla-dma, Il2rg, Coro1a, Satb1, cd3d, Ets1, Rab27a, Cd28, Cd38, Lyn, Tgfb1, RT1-Ba, cd8a                                                                      |
| response to external stimulus           | GO:0009605               | 19(154)              | 394(22938)            | 2, 15E-06              | Rac2, Coro1a, Satb1, Ptpn6, Ets1, Rab27a, Arbp, Cd28, Ninj1, Ptk2b, Cd38, Sod1, Lyn, Tgfb1, Id3, Ddt, cd8a, Rbm4, Rbm4b                                           |
| cell adhesion                           | GO:0007155               | 9(154)               | 276(22938)            | 1, 07E-04              | Fnbp4, Selpg, Lef1, Coro1a, Gpnmb, Ets1, Ninj1, Ptk2b, Tgfb1                                                                                                      |
| anatomical structure development        | GO:0048856               | 23(154)              | 798(22938)            | 3, 95E-04              | Cdc42se1, Nme2, Lef1, hla-dma, Dnase2a, Il2rg, Coro1a, Irf8, Satb1, Gpnmb, LOC364236, cd3d, Ets1, Cd28, Ninj1, Ptk2b, Sod1, Lyn, Tgfb1, Id3, RT1-Ba, Adrbk1, cd8a |
| response to abiotic stimulus            | GO:0009628               | 7(154)               | 206(22938)            | 4, 96E-04              | Ets1, Arbp, Ptk2b, Sod1, Lyn, Tgfb1, Rbm4                                                                                                                         |
| catabolic process                       | GO:0009056               | 13(154)              | 684(22938)            | 7, 34E-04              | Lyc2, Dnase1l3, Pla2g2d, Atp5o, Abcg1, Arrb2, Nedd8, Phf11, Dnase2a, Lyz2, Ets1, Sod1, Tgfb1                                                                      |
| organelle organization                  | GO:0006996               | 11(154)              | 525(22938)            | 8, 63E-04              | Npm1, Tuba1b, Dnase1l3, Timm13, Rac2, Coro1a, Satb1, Ets1, Cd28, Ptk2b, Sod1                                                                                      |
| microtubule-based process               | GO:0007017               | 5(154)               | 111(22938)            | 9, 25E-04              | Tuba1a, Tuba1c, Npm1, Tuba1b, Ets1                                                                                                                                |
| cell projection organization            | GO:0030030               | 5(154)               | 133(22938)            | 2, 06E-03              | Rac2, Coro1a, Ets1, Ptk2b, Sod1                                                                                                                                   |
| response to stress                      | GO:0006950               | 21(154)              | 742(22938)            | 2, 74E-03              | Lyz2, Ptpn6, Ets1, Rab27a, Arbp, Cd28, Ninj1, Ptk2b, Cd38, Sod1, Lyn, Tgfb1, Id3, RT1-Ba, Ddt, Adrbk1, cd8a, Ucp2, Tp53inp1, Rbm4, Rbm4b                          |
| actin filament-based process            | GO:0030029               | 4(154)               | 90(22938)             | 3, 19E-03              | Rac2, Coro1a, Ets1, Ptk2b                                                                                                                                         |
| response to biotic stimulus             | GO:0009607               | 5(154)               | 156(22938)            | 4, 10E-03              | Mx2, Mx1, Lyz2, Ets1, Tgfb1                                                                                                                                       |
| cell proliferation                      | GO:0008283               | 13(154)              | 275(22938)            | 4, 63E-03              | S100a6, cd5, Npm1, Rac2, Coro1a, Satb1, Ets1, Cd28, Ptk2b, Cd38, Lyn, Tgfb1, Id3                                                                                  |
| behavior                                | GO:0007610               | 5(154)               | 166(22938)            | 5, 32E-03              | Rac2, Coro1a, Ets1, Sod1, Tgfb1                                                                                                                                   |
| multicellular organismal development    | GO:0007275               | 22(154)              | 867(22938)            | 8, 50E-03              | Nme2, Lef1, hla-dma, Dnase2a, Il2rg, Coro1a, Irf8, Satb1, Gpnmb, LOC364236, cd3d, Ets1, Cd28, Ninj1, Ptk2b, Sod1, Lyn, Tgfb1, Id3, RT1-Ba, Adrbk1, cd8a           |
| cell death                              | GO:0008219               | 14(154)              | 352(22938)            | 1, 18E-02              | Diablo, cd5, Npm1, Dnase1l3, Dnase2a, Lyz2, Ets1, Rab27a, Cd28, Ptk2b, Sod1, Tgfb1, Id3, Tp53inp1                                                                 |
| cellular component movement             | GO:0006928               | 5(154)               | 220(22938)            | 1, 66E-02              | Selpg, Coro1a, Ets1, Ptk2b, Tgfb1                                                                                                                                 |
| cellular response to stimulus           | GO:0051716               | 5(154)               | 250(22938)            | 2, 70E-02              | Coro1a, Ets1, Ptk2b, Sod1, Lyn                                                                                                                                    |
| sexual reproduction                     | GO:0019953               | 4(154)               | 184(22938)            | 3, 57E-02              | Ets1, Ptk2b, Sod1, Tgfb1                                                                                                                                          |

## HCO up-regulated

| <i>Gene Ontology category (level 3)</i> | <i>Items</i> | <i>S</i> | <i>TS</i>  | <i>Hyp</i> | <i>Genes</i>                            |
|-----------------------------------------|--------------|----------|------------|------------|-----------------------------------------|
| multicellular organism growth           | GO:0035264   | 3(33)    | 88(22938)  | 2, 74E-04  | Igf1, Tshr, Lep                         |
| response to external stimulus           | GO:0009605   | 5(33)    | 914(22938) | 9, 33E-03  | F13a1, Serpina3n, Alb, Igf1, Lep        |
| behavior                                | GO:0007610   | 7(33)    | 443(22938) | 2, 64E-02  | Alb, S100b, Igf1, Tshr, Oxtr, Lep, Sncg |

## HOO down-regulated

| <i>Gene Ontology category (level 3)</i> | <i>Items</i> | <i>S</i> | <i>TS</i>  | <i>Hyp</i> | <i>Genes</i>                                                                               |
|-----------------------------------------|--------------|----------|------------|------------|--------------------------------------------------------------------------------------------|
| alcohol metabolic process               | GO:0006066   | 14(67)   | 546(22938) | 4, 89E-05  | Pfkfb3, Bche, Tkt, Pfkf, Taldo1, Pygl, Pdk1, Insig1, Chpt1, Pc, Cyb5r3, Dhcr7, Pdhb, pdha1 |

## HOO up-regulated

| <i>Gene Ontology category (level 3)</i> | <i>Items</i> | <i>S</i> | <i>TS</i>  | <i>Hyp</i> | <i>Genes</i>                                           |
|-----------------------------------------|--------------|----------|------------|------------|--------------------------------------------------------|
| response to external stimulus           | GO:0009605   | 8(53)    | 912(22938) | 1, 10E-03  | Tpm1, Sdc1, Cyr61, Fn1, Ccnd1, Fgf10, Serpina3n, Timp1 |
| behavior                                | GO:0007610   | 5(53)    | 443(22938) | 3, 52E-03  | Oxtr, Sncg, Penk1, Cyr61, Fgf10                        |
| cell adhesion                           | GO:0007155   | 6(53)    | 667(22938) | 4, 25E-03  | Vcan, Spon1, Tpm1, Sdc1, Cyr61, Fn1                    |
| actin filament-based process            | GO:0030029   | 3(53)    | 224(22938) | 1, 50E-02  | Dbn1, Cnn3, Tpm1                                       |
| response to abiotic stimulus            | GO:0009628   | 4(53)    | 490(22938) | 2, 65E-02  | LOC363060, Hspb6, Hmgn1, Ccnd1                         |

## 51 days

### HCO down-regulated

| <i>Gene Ontology category (level 3)</i> | <i>Items</i> | <i>S</i> | <i>TS</i>  | <i>Hyp</i> | <i>Genes</i>                                                                                                                                                |
|-----------------------------------------|--------------|----------|------------|------------|-------------------------------------------------------------------------------------------------------------------------------------------------------------|
| alcohol metabolic process               | GO:0006066   | 22(120)  | 545(22938) | 8, 86E-10  | Mif, Lss, Adipoq, Bche, Taldo1, Pfkfb3, Dgat2, Pygl, Tkt, Insig1, Pdk1, Aldoa, Pc, Gpd1, Cat, LOC678700, G6pd, Mdh1, Pdhb, Sod1, Dhcr7, Cyb5r3              |
| oxidation reduction                     | GO:0055114   | 22(120)  | 561(22938) | 1, 59E-08  | Cebpa, Gpd1, Sc5dl, Cat, LOC678700, G6pd, Retsat, Mdh1, Uqcrcfs1, Aldh2, Hsd17b12, Pdhb, Sod1, Dhcr7, Cyb5r3, Sod3, Akr7a2, Prdx6, Akr1c14, Scd4, Scd1, Scd |
| response to biotic stimulus             | GO:0009607   | 8(120)   | 289(22938) | 1, 43E-04  | Mx2, Mx1, Mgst1, Hsp90ab1, Ifitm2, Mif, Aldoa, Cebpa                                                                                                        |
| multicellular organism growth           | GO:0035264   | 4(120)   | 88(22938)  | 1, 18E-03  | Gpam, G6pd, Sod1, Dhcr7                                                                                                                                     |
| cytokine production                     | GO:0001816   | 5(120)   | 166(22938) | 1, 82E-03  | Fabp4, Adipoq, Cebpa, G6pd, Sod1                                                                                                                            |
| response to external stimulus           | GO:0009605   | 12(120)  | 911(22938) | 2, 97E-03  | Acs1, Cox4i1, Aacs, Ddt, Fabp4, Adora1, Mif, Adipoq, Bche, Cebpa, G6pd, Sod1                                                                                |
| cellular response to stimulus           | GO:0051716   | 8(120)   | 615(22938) | 1, 56E-02  | Lpin1, Mif, Insig1, Cebpa, Cat, Aldh2, Sod1, Prdx6                                                                                                          |
| aging                                   | GO:0007568   | 3(120)   | 125(22938) | 2, 80E-02  | Atp5g3, Mif, Sod1                                                                                                                                           |
| cell death                              | GO:0008219   | 9(120)   | 827(22938) | 2, 97E-02  | Vdac1, Cstb, Dnase2a, Adora1, Adipoq, Cebpa, Cat, G6pd, Sod1                                                                                                |

### HOO down-regulated

| <i>Gene Ontology category (level 3)</i> | <i>Items</i> | <i>S</i> | <i>TS</i>  | <i>Hyp</i> | <i>Genes</i>                                                                                                                                           |
|-----------------------------------------|--------------|----------|------------|------------|--------------------------------------------------------------------------------------------------------------------------------------------------------|
| alcohol metabolic process               | GO:0006066   | 23(98)   | 546(22938) | 8, 13E-12  | Lss, Hk2, Taldo1, Aldoa, Insig1, Bche, Tkt, Dgat2, Pygl, Pdk1, Pc, Mdh1, Nsdhl, Hsd11b1, Cyb5r3, Sod1, Ldhb, pdha1, Dhcr7, Gpd1, LOC678700, G6pd, Pdhb |
| oxidation reduction                     | GO:0055114   | 21(98)   | 562(22938) | 2, 26E-09  | Sod3, Mdh1, Nsdhl, Hsd11b1, Scd4, Scd1, Scd, Akr7a2, Cyb5r3, Acadsb, Sod1, Ldhb, pdha1, Hsd17b12, Dhcr7, Gpd1, LOC678700, G6pd, Aox4, Aox3, Pdhb       |
| response to external stimulus           | GO:0009605   | 13(98)   | 914(22938) | 1, 37E-04  | Gas6, Aacs, Pparg, Scnn1b, Fabp4, Acs1, Timp3, Adora1, C6, tgfb3, Bche, Sod1, G6pd                                                                     |
| multicellular organism growth           | GO:0035264   | 4(98)    | 88(22938)  | 5, 55E-04  | Gpam, Sod1, Dhcr7, G6pd                                                                                                                                |
| cytokine production                     | GO:0001816   | 4(98)    | 166(22938) | 5, 64E-03  | Pparg, Fabp4, Sod1, G6pd                                                                                                                               |
| aging                                   | GO:0007568   | 3(98)    | 125(22938) | 1, 65E-02  | Timp3, tgfb3, Sod1                                                                                                                                     |
| cell proliferation                      | GO:0008283   | 7(98)    | 747(22938) | 4, 10E-02  | S100a6, Pparg, Fabp4, Kit, Adora1, tgfb3, Dhcr7                                                                                                        |

## 100 days

### LF-HOO down-regulated

| <i>Gene Ontology category (level 3)</i> | <i>Items</i> | <i>S</i> | <i>TS</i>  | <i>Hyp</i> | <i>Genes</i>                |
|-----------------------------------------|--------------|----------|------------|------------|-----------------------------|
| response to external stimulus           | GO:0009605   | 5(34)    | 915(22938) | 1, 06E-02  | Aacs, Acsl1, Asns, Mif, Alb |
| cellular response to stimulus           | GO:0051716   | 4(34)    | 616(22938) | 1, 26E-02  | Insig1, Asns, Mif, Alb      |
| alcohol metabolic process               | GO:0006066   | 3(34)    | 546(22938) | 4, 65E-02  | Pc, Insig1, Mif             |

## 246 days

### HCO down-regulated

| <i>Gene Ontology category (level 3)</i> | <i>Items</i> | <i>S</i> | <i>TS</i>  | <i>Hyp</i> | <i>Genes</i>                                                                                                             |
|-----------------------------------------|--------------|----------|------------|------------|--------------------------------------------------------------------------------------------------------------------------|
| alcohol metabolic process               | GO:0006066   | 18(135)  | 547(22938) | 3, 78E-05  | Tkt, Dgat2, Taldo1, Pdk1, Chpt1, Bche, Pygl, Pc, Aldoa, Cyb5r3, Nsdhl, Pdhb, RGD1562690, Ldha, Mdh1, Dhcr7, Ldhb, Insig1 |
| response to external stimulus           | GO:0009605   | 15(135)  | 916(22938) | 3, 31E-04  | RT1-CE16, Gas6, Cmk1r1, tgfb3, Cfb, Aacs, Scnn1b, C6, Cox4i1, Ddt, Bche, RGD1562690, Ldha, Pparg, Asns                   |
| oxidation reduction                     | GO:0055114   | 16(135)  | 563(22938) | 2, 19E-02  | Cdo1, Hsd17b12, Cyb5r3, Aox3, Nsdhl, Aldh6a1, Me1, Pdhb, RGD1562690, Ldha, Mdh1, Dhcr7, Ivd, Ldhb, Uqcfs1, Akr7a2        |
| cell death                              | GO:0008219   | 10(135)  | 828(22938) | 2, 46E-02  | Serpinb9, Sycp3, Vdac1, Cdkn2c, tgfb3, C6, Hspb1, RGD1562690, Ldha, Asns                                                 |

### LF-HCO down-regulated

| <i>Gene Ontology category (level 3)</i> | <i>Items</i> | <i>S</i> | <i>TS</i>  | <i>Hyp</i> | <i>Genes</i>                                                                                                                         |
|-----------------------------------------|--------------|----------|------------|------------|--------------------------------------------------------------------------------------------------------------------------------------|
| oxidation reduction                     | GO:0055114   | 20(94)   | 564(22938) | 1, 16E-08  | Uqcfs1, Scd, Prdx6, Pdhb, Nsdhl, Me1, Mdh1, Ldhb, Hsd17b12, Gpd1, Etfb, Cyb5r3, Cdo1, Aox3, Aoc3, Aldh6a1, Akr7a2, Dhcr7, Ldha, G6pd |
| alcohol metabolic process               | GO:0006066   | 17(94)   | 545(22938) | 7, 43E-06  | Pygl, Pdk1, Pc, Insig1, Dgat2, Chpt1, Aldoa, Pdhb, Nsdhl, Mdh1, Ldhb, Gpd1, Cyb5r3, Dhcr7, Ldha, G6pd, Bche                          |
| multicellular organism growth           | GO:0035264   | 4(94)    | 86(22938)  | 4, 34E-04  | Gpam, Tshr, Dhcr7, G6pd                                                                                                              |
| cell death                              | GO:0008219   | 11(94)   | 825(22938) | 5, 55E-04  | Vdac1, Serpinb9, Ptma, Hspb1, Cidec, Cdkn2c, Ldha, G6pd, C6, Adora1, Tgfb3                                                           |
| cell proliferation                      | GO:0008283   | 7(94)    | 745(22938) | 3, 34E-02  | S100a6, Dhcr7, Ptma, Cdkn2c, Pparg, Adora1, Tgfb3                                                                                    |

## HOO down-regulated

| Gene Ontology category (level 3) | Items      | S      | TS         | Hyp       | Genes                                                              |
|----------------------------------|------------|--------|------------|-----------|--------------------------------------------------------------------|
| multicellular organism growth    | GO:0035264 | 3(43)  | 88(22938)  | 6, 03E-04 | Gpam, Dhcr7, G6pd                                                  |
| oxidation reduction              | GO:0055114 | 5(43)  | 562(22938) | 3, 87E-03 | Dhcr7, Nsdhl, LOC678700, G6pd, pdha1                               |
| alcohol metabolic process        | GO:0006066 | 10(43) | 545(22938) | 5, 00E-03 | Chpt1, Pc, Aldoa, Pygl, Pdk1, Dhcr7, Nsdhl, LOC678700, G6pd, pdha1 |
| response to external stimulus    | GO:0009605 | 5(43)  | 915(22938) | 2, 75E-02 | Aacs, C6, Scnn1b, Cox4i1, G6pd                                     |

## LF-HOO down-regulated

| Gene Ontology category (level 3) | Items      | S      | TS         | Hyp       | Genes                                                                                                                |
|----------------------------------|------------|--------|------------|-----------|----------------------------------------------------------------------------------------------------------------------|
| alcohol metabolic process        | GO:0006066 | 18(78) | 545(22938) | 2, 50E-08 | Dgat2, Tkt, Prkaa2, Lss, Bche, Taldo1, Chpt1, Pdk1, Pygl, Aldoa, Pc, LOC678700, G6pd, Ldhb, Nsdhl, Mdh1, Dhcr7, Pdhb |
| multicellular organism growth    | GO:0035264 | 4(78)  | 88(22938)  | 2, 32E-04 | Tshr, Gpam, G6pd, Dhcr7                                                                                              |
| response to external stimulus    | GO:0009605 | 9(78)  | 914(22938) | 3, 79E-03 | Acsl1, Asns, Cox4i1, C6, Scnn1g, Scnn1b, tgfb3, Bche, G6pd                                                           |
| oxidation reduction              | GO:0055114 | 13(78) | 561(22938) | 5, 03E-03 | Scd, Prdx6, LOC678700, G6pd, Aldh6a1, Ldhb, Nsdhl, Aox3, Hsd17b12, Mdh1, Akr7a2, Dhcr7, Pdhb                         |
| cell death                       | GO:0008219 | 8(78)  | 826(22938) | 6, 95E-03 | Cdkn2c, Vdac1, Ptma, Sycp3, Asns, C6, tgfb3, G6pd                                                                    |

<sup>a</sup>: enriched Gene Ontology categories

<sup>b</sup>: number of genes in the input list that have been matched in the enriched set and the total number of genes in the list

<sup>c</sup>: number of genes in the reference list that match with the enriched set and total number of genes in the reference list

<sup>d</sup>: pvalue calculated by the hypergeometric function

<sup>e</sup>: the genes of the input list that match with the enriched items
