# Supplementary material for: Diets high in corn oil or extra-virgin olive oil differentially modify the gene expression profile of the mammary gland and influence experimental breast cancer susceptibility
Source: Springer Nature journal article supplement (doi:10.1007/s00394-015-0958-2), 2015-06-19
Supplement: MOESM3 [file 8392274]

**Article title:** Diets high in corn oil or extra virgin olive oil differentially modify the gene expression profile of the mammary gland and influence experimental breast cancer susceptibility

**Journal name:** European Journal of Nutrition

**Authors names:** Raquel Moral<sup>1</sup>, Raquel Escrich<sup>1</sup>, Montserrat Solanas<sup>1</sup>, Elena Vela<sup>1</sup>, M. Carme Ruíz de Villa<sup>2</sup>, Eduard Escrich<sup>1</sup>.

**Affiliations:** <sup>1</sup>Department of Cell Biology, Physiology and Immunology, Physiology Unit, Medicine School, Universitat Autònoma de Barcelona, 08193 Bellaterra, Barcelona, Spain; <sup>2</sup>Department of Statistics, Universitat de Barcelona, 08028 Barcelona, Spain.

**Corresponding author:** Dr. Eduard Escrich; Department of Cell Biology, Physiology and Immunology; Physiology Unit, Medicine School; Universitat Autònoma de Barcelona; 08193 Bellaterra (Barcelona), Spain. Phone: +34 93 581 14 23, Fax: +34 93 581 29 86. Eduard.Escrich@uab.es

### **Electronic Supplementary Material 3:**

#### **Supplementary Table 3**

Enriched Gene Ontology (GO) categories in down- and up-modulated genes in mammary gland by effect of the experimental high fat diets.

Modulated genes were sub-classified in “common” (modulated in more than one group) or “specific” (found as modulated in one specific group)

Lists of “common” and “specific” genes found in high fat diet groups at 36 days of age were analyzed using Genecodis program by Babelomics platform setting GO annotations at level 3-6. Only statistically significant enriched categories are indicated.

## 36 days

### Common down-regulated genes (in HCO and HOO)

(No significant enriched categories)

### Specific down-regulated genes (only in HCO)

| Gene Ontology category (levels 3-6)                    | Items <sup>a</sup> | S <sup>b</sup> | TS <sup>c</sup> | Hyp <sup>d</sup> | Genes <sup>e</sup>                                                                                                          |
|--------------------------------------------------------|--------------------|----------------|-----------------|------------------|-----------------------------------------------------------------------------------------------------------------------------|
| immune response                                        | GO:0006955         | 18(101)        | 560(22938)      | 4, 13E-06        | RT1-Bb, Irf8, Il2rg, Hla-dmb, Cd79b, Cd37, Cd19, Ccl21b, RT1-Ba, Hla-dma, Rbm4b, Arbp, Cd74, Rab27a, Cd8a, Lyn, Cd28, Tgfb1 |
| immune system development                              | GO:0002520         | 14(101)        | 304(22938)      | 6, 98E-06        | Cd3d, LOC364236, Dnase2a, Satb1, Irf8, Il2rg, RT1-Ba, Hla-dma, Coro1a, Cd8a, Nme2, Lyn, Cd28, Tgfb1                         |
| tissue remodeling                                      | GO:0002684         | 12(101)        | 197(22938)      | 7, 03E-06        | Il2rg, Cd79b, Cd37, Cd19, RT1-Ba, Hla-dma, Coro1a, Cd5, Cd38, Lyn, Cd28, Tgfb1                                              |
| T cell activation                                      | GO:0042110         | 11(101)        | 172(22938)      | 2, 71E-05        | Cd3d, Satb1, Il2rg, RT1-Ba, Hla-dma, Rab27a, Coro1a, Cd8a, Cd5, Cd28, Tgfb1                                                 |
| lymphocyte activation                                  | GO:0046649         | 12(101)        | 237(22938)      | 5, 93E-05        | Cd3d, Satb1, Il2rg, RT1-Ba, Hla-dma, Rab27a, Coro1a, Cd8a, Cd5, Cd38, Cd28, Tgfb1                                           |
| cell proliferation                                     | GO:0008283         | 12(101)        | 746(22938)      | 1, 08E-04        | S100a6, Satb1, Rac2, Coro1a, Cd5, Id3, Cd38, Ptk2b, Npm1, Lyn, Cd28, Tgfb1                                                  |
| regulation of immune system process                    | GO:0002682         | 13(101)        | 311(22938)      | 1, 14E-04        | Il2rg, Cd79b, Cd37, Cd19, RT1-Ba, Hla-dma, Coro1a, Cd5, Cd38, Nme2, Lyn, Cd28, Tgfb1                                        |
| positive regulation of cell proliferation              | GO:0008284         | 8(101)         | 337(22938)      | 1, 23E-04        | Rac2, Coro1a, Id3, Cd38, Ptk2b, Lyn, Cd28, Tgfb1                                                                            |
| cell activation                                        | GO:0001775         | 13(101)        | 313(22938)      | 1, 23E-04        | Cd3d, Satb1, Il2rg, RT1-Ba, Hla-dma, Rab27a, Coro1a, Cd8a, Cd5, Cd38, Lyn, Cd28, Tgfb1                                      |
| homeostasis of number of cells                         | GO:0048872         | 5(101)         | 111(22938)      | 1, 33E-04        | LOC364236, Dnase2a, Coro1a, Lyn, Tgfb1                                                                                      |
| response to organic cyclic substance                   | GO:0014070         | 6(101)         | 179(22938)      | 1, 43E-04        | Adrbk1, Nedd8, Ptk2b, Lyn, Lef1, Tgfb1                                                                                      |
| response to wounding                                   | GO:0009611         | 10(101)        | 546(22938)      | 1, 49E-04        | Ptfn6, Ninj1, Rbm4b, Arbp, Rab27a, Cd8a, Id3, Lyn, Cd28, Tgfb1                                                              |
| regulation of cell communication                       | GO:0010646         | 13(101)        | 904(22938)      | 1, 68E-04        | Rhoh, Rasgrp1, Dgkz, Cd8a, Cd5, Arrb2, Arhgef1, Cd38, Adrbk1, Ptk2b, Lyn, Lef1, Tgfb1                                       |
| regulation of cell proliferation                       | GO:0042127         | 10(101)        | 584(22938)      | 2, 55E-04        | Rac2, Coro1a, Cd5, Id3, Cd38, Ptk2b, Npm1, Lyn, Cd28, Tgfb1                                                                 |
| cell death                                             | GO:0008219         | 12(101)        | 825(22938)      | 2, 74E-04        | Tp53inp1, Diablo, Dnase1l3, Dnase2a, Lyz2, Rab27a, Cd5, Id3, Ptk2b, Npm1, Cd28, Tgfb1                                       |
| positive regulation of cell death                      | GO:0010942         | 7(101)         | 294(22938)      | 3, 26E-04        | Tp53inp1, Diablo, Rab27a, Cd5, Id3, Cd28, Tgfb1                                                                             |
| response to protein stimulus                           | GO:0051789         | 4(101)         | 76(22938)       | 3, 56E-04        | Hsp90ab1, Id3, Lyn, Tgfb1                                                                                                   |
| antigen processing and presentation of peptide antigen | GO:0048002         | 3(101)         | 33(22938)       | 4, 11E-04        | RT1-Bb, RT1-Ba, Hla-dma                                                                                                     |

|                                             |            |         |            |           |                                                                                 |
|---------------------------------------------|------------|---------|------------|-----------|---------------------------------------------------------------------------------|
| response to organic substance               | GO:0010033 | 11(101) | 746(22938) | 4, 45E-04 | Uqcrcfs1, Hsp90ab1, Coro1a, Id3, Cd38, Adrbk1, Nedd8, Ptk2b, Lyn, Lef1, Tgfb1   |
| bone remodeling                             | GO:0046849 | 3(101)  | 36(22938)  | 5, 32E-04 | Rac2, Cd38, Tgfb1                                                               |
| B cell activation                           | GO:0042113 | 4(101)  | 89(22938)  | 6, 49E-04 | Il2rg, Cd38, Cd28, Tgfb1                                                        |
| defense response                            | GO:0006952 | 9(101)  | 546(22938) | 6, 89E-04 | Lyz2, RT1-Ba, Rbm4b, Arbp, Rab27a, Cd8a, Lyn, Cd28, Tgfb1                       |
| apoptosis                                   | GO:0006915 | 11(101) | 789(22938) | 7, 09E-04 | Tp53inp1, Diablo, Dnase1l3, Dnase2a, Rab27a, Cd5, Id3, Ptk2b, Npm1, Cd28, Tgfb1 |
| programmed cell death                       | GO:0012501 | 11(101) | 797(22938) | 7, 70E-04 | Tp53inp1, Diablo, Dnase1l3, Dnase2a, Rab27a, Cd5, Id3, Ptk2b, Npm1, Cd28, Tgfb1 |
| positive regulation of catalytic activity   | GO:0043085 | 7(101)  | 341(22938) | 7, 86E-04 | Dgka, Gadd45b, Diablo, Dgkz, Ptk2b, Npm1, Tgfb1                                 |
| positive regulation of cell activation      | GO:0050867 | 8(101)  | 98(22938)  | 1, 21E-03 | Il2rg, RT1-Ba, Hla-dma, Coro1a, Cd5, Cd38, Cd28, Tgfb1                          |
| protein complex assembly                    | GO:0006461 | 8(101)  | 477(22938) | 1, 23E-03 | Tuba1b, MGC72973, Vamp8, Hla-dma, Coro1a, Ptk2b, Npm1, Tgfb1                    |
| immunoglobulin production                   | GO:0002377 | 3(101)  | 48(22938)  | 1, 24E-03 | Cd37, Cd28, Tgfb1                                                               |
| positive regulation of transferase activity | GO:0051347 | 5(101)  | 181(22938) | 1, 24E-03 | Dgka, Gadd45b, Dgkz, Ptk2b, Tgfb1                                               |
| membrane organization                       | GO:0016044 | 6(101)  | 283(22938) | 1, 59E-03 | Vamp8, Cdc42se1, Timm13, Coro1a, Arrb2, Tgfb1                                   |
| inflammatory response                       | GO:0006954 | 6(101)  | 296(22938) | 2, 00E-03 | Rbm4b, Arbp, Cd8a, Lyn, Cd28, Tgfb1                                             |
| regulation of programmed cell death         | GO:0043067 | 9(101)  | 640(22938) | 2, 07E-03 | Tp53inp1, Diablo, Rab27a, Cd5, Id3, Ptk2b, Npm1, Cd28, Tgfb1                    |
| erythrocyte homeostasis                     | GO:0034101 | 3(101)  | 58(22938)  | 2, 14E-03 | LOC364236, Dnase2a, Lyn                                                         |
| inflammatory response to antigenic stimulus | GO:0002437 | 3(101)  | 59(22938)  | 2, 25E-03 | Rbm4b, Arbp, Cd28                                                               |
| positive regulation of cell differentiation | GO:0045597 | 5(101)  | 212(22938) | 2, 48E-03 | Il2rg, RT1-Ba, Hla-dma, Lyn, Tgfb1                                              |
| tissue homeostasis                          | GO:0001894 | 3(101)  | 62(22938)  | 2, 60E-03 | Rac2, Coro1a, Cd38                                                              |
| mitochondrial transport                     | GO:0006839 | 3(101)  | 63(22938)  | 2, 72E-03 | Timm13, Atp5o, Ucp2                                                             |
| cell cycle                                  | GO:0007049 | 8(101)  | 543(22938) | 2, 76E-03 | Sept1, S100a6, Gadd45b, Tp53inp1, Id3, Npm1, Cd28, Tgfb1                        |
| regulation of cell differentiation          | GO:0045595 | 7(101)  | 432(22938) | 3, 02E-03 | Il2rg, RT1-Ba, Hla-dma, Id3, Nme2, Lyn, Tgfb1                                   |
| establishment of localization in cell       | GO:0051649 | 11(101) | 952(22938) | 3, 13E-03 | Timm13, Rac2, Cd74, Atp5o, Rab27a, Rhoh, Cd38, Ucp2, Adrbk1, Lyn, Tgfb1         |
| response to carbohydrate stimulus           | GO:0009743 | 3(101)  | 70(22938)  | 3, 66E-03 | Ptk2b, Lyn, Tgfb1                                                               |
| homeostatic process                         | GO:0042592 | 10(101) | 839(22938) | 3, 89E-03 | Prkcb, LOC364236, Dnase2a, Arbp, Rac2, Coro1a, Cd38, Ptk2b, Lyn, Tgfb1          |
| leukocyte mediated immunity                 | GO:0002443 | 9(101)  | 162(22938) | 4, 19E-03 | RT1-Ba, Hla-dma, Rbm4b, Arbp, Rab27a, Cd8a, Lyn, Cd28, Tgfb1                    |
| tissue remodeling                           | GO:0048771 | 3(101)  | 74(22938)  | 4, 28E-03 | Rac2, Cd38, Tgfb1                                                               |

|                                                                                           |            |         |            |           |                                                                      |
|-------------------------------------------------------------------------------------------|------------|---------|------------|-----------|----------------------------------------------------------------------|
| protein localization                                                                      | GO:0008104 | 10(101) | 869(22938) | 4, 97E-03 | Rab3ip, Hla-dma, Timm13, Rac2, Cd74, Rab27a, Rhoh, Nedd8, Lyn, Tgfb1 |
| tissue homeostasis                                                                        | GO:0000302 | 3(101)  | 79(22938)  | 5, 14E-03 | Ucp2, Adrbk1, Ptk2b                                                  |
| vesicle-mediated transport                                                                | GO:0016192 | 7(101)  | 479(22938) | 5, 29E-03 | Vamp8, Cdc42se1, Rab27a, Coro1a, Arrb2, Lyn, Tgfb1                   |
| protein transport                                                                         | GO:0015031 | 9(101)  | 752(22938) | 5, 96E-03 | Rab3ip, Hla-dma, Timm13, Rac2, Cd74, Rab27a, Rhoh, Lyn, Tgfb1        |
| response to oxidative stress                                                              | GO:0006979 | 4(101)  | 165(22938) | 6, 14E-03 | Cd38, Ucp2, Adrbk1, Ptk2b                                            |
| establishment of protein localization                                                     | GO:0045184 | 9(101)  | 762(22938) | 6, 48E-03 | Rab3ip, Hla-dma, Timm13, Rac2, Cd74, Rab27a, Rhoh, Lyn, Tgfb1        |
| negative regulation of cell differentiation                                               | GO:0051272 | 3(101)  | 89(22938)  | 7, 16E-03 | Coro1a, Ptk2b, Tgfb1                                                 |
| endocytosis                                                                               | GO:0006897 | 4(101)  | 174(22938) | 7, 38E-03 | Cdc42se1, Coro1a, Arrb2, Tgfb1                                       |
| intracellular transport                                                                   | GO:0046907 | 8(101)  | 657(22938) | 8, 52E-03 | Timm13, Rac2, Cd74, Atp5o, Rab27a, Rhoh, Ucp2, Tgfb1                 |
| cell adhesion                                                                             | GO:0007155 | 8(101)  | 667(22938) | 9, 28E-03 | Gpnmb, Fnbp4, Selplg, Ninj1, Coro1a, Ptk2b, Lef1, Tgfb1              |
| bone remodeling                                                                           | GO:0006812 | 8(101)  | 668(22938) | 9, 36E-03 | Atp5i, Prkcb, Rac2, Atp5o, Slc38a1, Coro1a, Lyn, Tgfb1               |
| cellular protein complex assembly                                                         | GO:0043623 | 4(101)  | 193(22938) | 1, 05E-02 | Tuba1b, Coro1a, Ptk2b, Tgfb1                                         |
| heterocycle metabolic process                                                             | GO:0046483 | 6(101)  | 424(22938) | 1, 12E-02 | Phf11, Atp5i, Atp5o, Arrb2, Nme2, Tgfb1                              |
| regulation of catalytic activity                                                          | GO:0050790 | 7(101)  | 565(22938) | 1, 25E-02 | Dgka, Gadd45b, Diablo, Dgkz, Ptk2b, Npm1, Tgfb1                      |
| regulation of binding                                                                     | GO:0051098 | 3(101)  | 114(22938) | 1, 40E-02 | Arrb2, Id3, Tgfb1                                                    |
| ion transport                                                                             | GO:0006811 | 9(101)  | 874(22938) | 1, 50E-02 | Fxyd5, Atp5i, Prkcb, Rac2, Atp5o, Slc38a1, Coro1a, Lyn, Tgfb1        |
| regulation of cell cycle                                                                  | GO:0051726 | 4(101)  | 219(22938) | 1, 61E-02 | Gadd45b, Id3, Cd28, Tgfb1                                            |
| DNA metabolic process                                                                     | GO:0006259 | 6(101)  | 461(22938) | 1, 63E-02 | Dnase1l3, Dnase2a, Id3, Npm1, Cd28, Tgfb1                            |
| aging                                                                                     | GO:0007568 | 3(101)  | 124(22938) | 1, 75E-02 | Adrbk1, Npm1, Tgfb1                                                  |
| secretion by cell                                                                         | GO:0032940 | 5(101)  | 341(22938) | 1, 75E-02 | Rab27a, Cd38, Adrbk1, Lyn, Tgfb1                                     |
| nuclear transport                                                                         | GO:0051169 | 4(101)  | 242(22938) | 2, 23E-02 | Rac2, Rab27a, Rhoh, Tgfb1                                            |
| acute inflammatory response                                                               | GO:0002526 | 3(101)  | 138(22938) | 2, 31E-02 | Rbm4b, Arbp, Lyn                                                     |
| response to hypoxia                                                                       | GO:0006935 | 3(101)  | 141(22938) | 2, 45E-02 | Rac2, Coro1a, Tgfb1                                                  |
| antigen processing and presentation of peptide or polysaccharide antigen via MHC class II | GO:0002504 | 4(101)  | 13(22938)  | 2, 46E-02 | RT1-Bb, Hla-dmb, RT1-Ba, Hla-dma                                     |
| cellular chemical homeostasis                                                             | GO:0055082 | 5(101)  | 373(22938) | 2, 47E-02 | Prkcb, Cd38, Ptk2b, Lyn, Tgfb1                                       |

|                                             |            |        |            |           |                                           |
|---------------------------------------------|------------|--------|------------|-----------|-------------------------------------------|
| cellular protein localization               | GO:0034613 | 6(101) | 509(22938) | 2, 51E-02 | Timm13, Rac2, Cd74, Rab27a, Rhoh, Tgfb1   |
| cellular homeostasis                        | GO:0030334 | 3(101) | 143(22938) | 2, 54E-02 | Coro1a, Ptk2b, Tgfb1                      |
| amine transport                             | GO:0015837 | 3(101) | 144(22938) | 2, 58E-02 | Slc38a1, Adrbk1, Lyn                      |
| secretion                                   | GO:0046903 | 5(101) | 387(22938) | 2, 83E-02 | Rab27a, Cd38, Adrbk1, Lyn, Tgfb1          |
| cytoskeleton organization                   | GO:0007010 | 5(101) | 394(22938) | 3, 03E-02 | Tuba1b, Rac2, Coro1a, Ptk2b, Npm1         |
| response to hormone stimulus                | GO:0009725 | 5(101) | 400(22938) | 3, 20E-02 | Uqcrcs1, Cd38, Ptk2b, Lyn, Tgfb1          |
| ion homeostasis                             | GO:0050801 | 5(101) | 406(22938) | 3, 38E-02 | Prkcb, Cd38, Ptk2b, Lyn, Tgfb1            |
| response to hypoxia                         | GO:0001666 | 3(101) | 163(22938) | 3, 54E-02 | Cd38, Ptk2b, Tgfb1                        |
| cellular chemical homeostasis               | GO:0051270 | 3(101) | 163(22938) | 3, 54E-02 | Coro1a, Ptk2b, Tgfb1                      |
| transmembrane transport                     | GO:0055085 | 3(101) | 165(22938) | 3, 65E-02 | Atp5i, Timm13, Atp5o                      |
| cytokine production                         | GO:0001816 | 3(101) | 165(22938) | 3, 65E-02 | Lyn, Cd28, Tgfb1                          |
| ion homeostasis                             | GO:0040012 | 3(101) | 166(22938) | 3, 71E-02 | Coro1a, Ptk2b, Tgfb1                      |
| dephosphorylation                           | GO:0016311 | 3(101) | 166(22938) | 3, 71E-02 | Dusp2, Ptpn6, Tgfb1                       |
| response to biotic stimulus                 | GO:0009607 | 4(101) | 289(22938) | 3, 90E-02 | Mx1, Lyz2, Hsp90ab1, Tgfb1                |
| protein complex assembly                    | GO:0008361 | 3(101) | 176(22938) | 4, 29E-02 | Cd38, Ptk2b, Tgfb1                        |
| negative regulation of cell differentiation | GO:0045596 | 3(101) | 180(22938) | 4, 53E-02 | Id3, Nme2, Tgfb1                          |
| response to drug                            | GO:0042493 | 4(101) | 304(22938) | 4, 55E-02 | Uqcrcs1, Ptk2b, Lyn, Tgfb1                |
| positive regulation of metabolic process    | GO:0009893 | 7(101) | 748(22938) | 4, 72E-02 | Ptk2b, Npm1, Nme2, Lyn, Lef1, Cd28, Tgfb1 |
| cellular homeostasis                        | GO:0019725 | 5(101) | 450(22938) | 4, 88E-02 | Prkcb, Cd38, Ptk2b, Lyn, Tgfb1            |

### Specific up-regulated genes (only in HCO)

| <i>Gene Ontology category (levels 3-6)</i>    | <i>Items</i> | <i>S</i> | <i>TS</i>  | <i>Hyp</i> | <i>Genes</i>                 |
|-----------------------------------------------|--------------|----------|------------|------------|------------------------------|
| regulation of developmental process           | GO:0050793   | 5(16)    | 819(22938) | 1, 80E-04  | Rtn4r, Itga7, Lep, Igf1, Alb |
| neurogenesis                                  | GO:0022008   | 4(16)    | 573(22938) | 5, 52E-04  | Chrdl1, Rtn4r, Lep, Igf1     |
| regulation of growth                          | GO:0040008   | 3(16)    | 251(22938) | 6, 52E-04  | Tshr, Lep, Igf1              |
| regulation of cellular component organization | GO:0051128   | 3(16)    | 343(22938) | 1, 61E-03  | Rtn4r, Itga7, Igf1           |

|                                    |            |       |            |           |                          |
|------------------------------------|------------|-------|------------|-----------|--------------------------|
| cell development                   | GO:0048468 | 4(16) | 844(22938) | 2, 32E-03 | Chrdl1, Rtn4r, Lep, Igf1 |
| nervous system development         | GO:0007399 | 4(16) | 887(22938) | 2, 79E-03 | Chrdl1, Rtn4r, Lep, Igf1 |
| regulation of cell differentiation | GO:0045595 | 3(16) | 433(22938) | 3, 12E-03 | Rtn4r, Lep, Igf1         |
| response to external stimulus      | GO:0009605 | 4(16) | 915(22938) | 3, 12E-03 | F13a1, Lep, Igf1, Alb    |
| response to organic substance      | GO:0010033 | 3(16) | 748(22938) | 1, 41E-02 | Lep, Igf1, Alb           |
| regulation of cell communication   | GO:0010646 | 3(16) | 906(22938) | 2, 34E-02 | S100b, Lep, Igf1         |

### Specific down-regulated genes (only in HOO)

| <i>Gene Ontology category (levels 3-6)</i>     | <i>Items</i> | <i>S</i> | <i>TS</i>  | <i>Hyp</i> | <i>Genes</i>                                                                               |
|------------------------------------------------|--------------|----------|------------|------------|--------------------------------------------------------------------------------------------|
| alcohol metabolic process                      | GO:0006066   | 14(43)   | 546(22938) | 6, 61E-08  | Pfkfb3, Pdk1, Tkt, Taldo1, Pygl, Bche, Insig1, Dhcr7, Cyb5r3, Chpt1, Pdhb, Pdha1, Pc, Pfkf |
| cellular carbohydrate metabolic process        | GO:0044262   | 10(43)   | 341(22938) | 5, 74E-05  | Pfkfb3, Lalba, Acly, Tkt, Taldo1, Pygl, Pdhb, Pdha1, Pc, Pfkf                              |
| carbohydrate biosynthetic process              | GO:0016051   | 4(43)    | 141(22938) | 1, 40E-04  | Lalba, Tkt, Pygl, Pc                                                                       |
| steroid metabolic process                      | GO:0008202   | 4(43)    | 177(22938) | 3, 34E-04  | Insig1, Hsd17b12, Dhcr7, Cyb5r3                                                            |
| lipid biosynthetic process                     | GO:0008610   | 9(43)    | 299(22938) | 3, 68E-04  | Hsd17b12, Dhcr7, Cyb5r3, Chpt1, Scd, Pc, Gpam, Elovl6, Acaca                               |
| generation of precursor metabolites and energy | GO:0006091   | 5(43)    | 335(22938) | 3, 94E-04  | Pfkfb3, Pygl, Pdhb, Pdha1, Pfkf                                                            |
| response to organic substance                  | GO:0010033   | 7(43)    | 746(22938) | 4, 34E-04  | Tgfb3, Tf, Bche, Insig1, Me1, Acaca, Pfkf                                                  |
| lipid metabolic process                        | GO:0006629   | 12(43)   | 735(22938) | 6, 60E-04  | Insig1, Hsd17b12, Dhcr7, Cyb5r3, Chpt1, Slc27a1, Scd, Pc, Gpam, Elovl6, Acadsb, Acaca      |
| cellular lipid metabolic process               | GO:0044255   | 11(43)   | 622(22938) | 1, 40E-03  | Insig1, Hsd17b12, Dhcr7, Cyb5r3, Chpt1, Slc27a1, Scd, Gpam, Elovl6, Acadsb, Acaca          |
| chemical homeostasis                           | GO:0048878   | 5(43)    | 483(22938) | 2, 02E-03  | Pygl, Slc2a4, Tf, Scd, Acaca                                                               |
| carbohydrate metabolic process                 | GO:0005975   | 11(43)   | 674(22938) | 3, 18E-03  | Pfkfb3, Pdk1, Lalba, Acly, Tkt, Taldo1, Pygl, Pdhb, Pdha1, Pc, Pfkf                        |
| hexose metabolic process                       | GO:0019318   | 8(43)    | 291(22938) | 6, 01E-03  | Pfkfb3, Pdk1, Tkt, Taldo1, Pdhb, Pdha1, Pc, Pfkf                                           |
| response to hormone stimulus                   | GO:0009725   | 4(43)    | 399(22938) | 6, 52E-03  | Tgfb3, Bche, Insig1, Me1                                                                   |
| carboxylic acid metabolic process              | GO:0019752   | 10(43)   | 566(22938) | 7, 12E-03  | Slc27a1, Scd, Pdhb, Pdha1, Pc, Me1, Gpam, Elovl6, Acadsb, Acaca                            |
| organic acid metabolic process                 | GO:0006082   | 10(43)   | 567(22938) | 7, 24E-03  | Slc27a1, Scd, Pdhb, Pdha1, Pc, Me1, Gpam, Elovl6, Acadsb, Acaca                            |
| response to steroid hormone stimulus           | GO:0048545   | 3(43)    | 236(22938) | 9, 80E-03  | Tgfb3, Bche, Insig1                                                                        |
| homeostatic process                            | GO:0042592   | 5(43)    | 840(22938) | 1, 98E-02  | Pygl, Slc2a4, Tf, Scd, Acaca                                                               |

transmission of nerve impulse GO:0019226 3(43) 355(22938) 2, 88E-02 Tf, Bche, Scd

### Specific up-regulated genes (only in HOO)

| <i>Gene Ontology category (levels 3-6)</i> | <i>Items</i> | <i>S</i> | <i>TS</i>  | <i>Hyp</i> | <i>Genes</i>                                      |
|--------------------------------------------|--------------|----------|------------|------------|---------------------------------------------------|
| muscle contraction                         | GO:0006936   | 7(44)    | 119(22938) | 2, 77E-04  | Tnni2, Myl1, Actn3, Pgam2, Hspb6, Mylpf, Tpm1     |
| response to external stimulus              | GO:0009605   | 8(44)    | 913(22938) | 3, 03E-04  | Timp1, Fn1, Fgf10, Eno3, Ccnd1, Cyr61, Sdc1, Tpm1 |
| response to organic substance              | GO:0010033   | 7(44)    | 747(22938) | 5, 06E-04  | Atp5g2, Socs2, Pck1, Timp1, Ccnd1, Cyr61, Sdc1    |
| response to wounding                       | GO:0009611   | 6(44)    | 546(22938) | 5, 79E-04  | Timp1, Fn1, Fgf10, Eno3, Sdc1, Tpm1               |
| response to hormone stimulus               | GO:0009725   | 5(44)    | 399(22938) | 9, 66E-04  | Socs2, Pck1, Timp1, Ccnd1, Sdc1                   |
| cell adhesion                              | GO:0007155   | 6(44)    | 667(22938) | 1, 63E-03  | Vcan, Spon1, Fn1, Cyr61, Sdc1, Tpm1               |
| aging                                      | GO:0007568   | 3(44)    | 125(22938) | 1, 78E-03  | Socs2, Timp1, Eno3                                |
| hexose metabolic process                   | GO:0019318   | 4(44)    | 291(22938) | 2, 31E-03  | Pfkm, Pgam2, Pck1, Eno3                           |
| response to metal ion                      | GO:0010038   | 3(44)    | 145(22938) | 2, 71E-03  | Pgam2, Ccnd1, Sdc1                                |
| regulation of locomotion                   | GO:0040012   | 3(44)    | 166(22938) | 3, 97E-03  | Fgf10, Cyr61, Tpm1                                |
| cellular carbohydrate metabolic process    | GO:0044262   | 4(44)    | 341(22938) | 4, 08E-03  | Pfkm, Pgam2, Pck1, Eno3                           |
| response to inorganic substance            | GO:0010035   | 3(44)    | 170(22938) | 4, 24E-03  | Pgam2, Ccnd1, Sdc1                                |
| response to peptide hormone stimulus       | GO:0043434   | 3(44)    | 188(22938) | 5, 61E-03  | Socs2, Pck1, Timp1                                |
| tissue development                         | GO:0009888   | 5(44)    | 606(22938) | 5, 88E-03  | Fgf10, Eno3, Ccnd1, Sdc1, Mylpf                   |
| organ morphogenesis                        | GO:0009887   | 5(44)    | 675(22938) | 9, 15E-03  | Hmgn1, Fgf10, Ccnd1, Cyr61, Sdc1                  |
| response to steroid hormone stimulus       | GO:0048545   | 3(44)    | 236(22938) | 1, 04E-02  | Socs2, Ccnd1, Sdc1                                |
| cellular response to DNA damage stimulus   | GO:0034984   | 3(44)    | 250(22938) | 1, 22E-02  | Pcna, Hmgn1, Ccnd1                                |
| response to abiotic stimulus               | GO:0009628   | 4(44)    | 490(22938) | 1, 42E-02  | LOC363060, Hspb6, Hmgn1, Ccnd1                    |
| response to DNA damage stimulus            | GO:0006974   | 3(44)    | 278(22938) | 1, 62E-02  | Pcna, Hmgn1, Ccnd1                                |
| regulation of developmental process        | GO:0050793   | 5(44)    | 819(22938) | 1, 97E-02  | Timp1, Fn1, Fgf10, Ccnd1, Cyr61                   |
| alcohol metabolic process                  | GO:0006066   | 4(44)    | 546(22938) | 2, 03E-02  | Pfkm, Pgam2, Pck1, Eno3                           |
| cellular response to stimulus              | GO:0051716   | 4(44)    | 615(22938) | 2, 98E-02  | Pcna, Socs2, Hmgn1, Ccnd1                         |

|                                |            |       |            |           |                           |
|--------------------------------|------------|-------|------------|-----------|---------------------------|
| cation transport               | GO:0006812 | 4(44) | 667(22938) | 3, 85E-02 | Tnni2, Atp5g2, Tpm1, Dbn1 |
| carbohydrate metabolic process | GO:0005975 | 4(44) | 674(22938) | 3, 97E-02 | Pfkm, Pgam2, Pck1, Eno3   |
| cellular response to stress    | GO:0033554 | 3(44) | 429(22938) | 4, 89E-02 | Pcna, Hmgn1, Ccnd1        |

<sup>a</sup>: enriched Gene Ontology categories

<sup>b</sup>: number of genes in the input list that have been matched in the enriched set and the total number of genes in the list

<sup>c</sup>: number of genes in the reference list that match with the enriched set and total number of genes in the reference list

<sup>d</sup>: pvalue calculated by the hypergeometric function

<sup>e</sup>: the genes of the input list that match with the enriched items
